# Supplementary material for: Ag@BiOCl super-hydrophobic nanostructure for enhancing SERS detection sensitivity
Source: Royal Society of Chemistry journal article supplement (doi:10.1039/d0ra01226b), 2020-01-01
Supplement: d0ra01226b1.pdf [file d0ra01226b1.pdf]

Supplementary Materials for

**Ag@BiOCl Super-hydrophobic Nanostructure for Enhancing SERS Detection Sensitivity**

*Huimin Feng,<sup>‡</sup> Fengyou Yang,<sup>‡</sup> Jianjie Dong, and Qian Liu\**

\* E-mail: liuq@nanoctr.cn

<sup>‡</sup>These authors contributed equally.

## Section S1. CA of Si substrate before and after surface modification

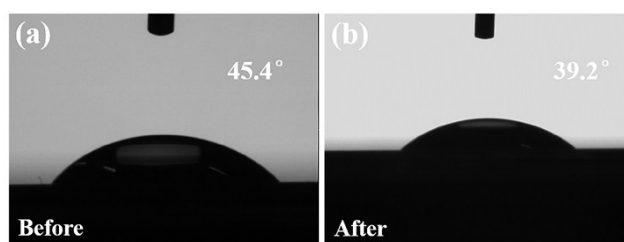

**Fig. S1 (a-b)** CA of Si substrate before and after surface modification.

## Section S2. SEM images and Raman spectra of R6G molecules for Ag@BiOCl NSs with different Ag depositing times

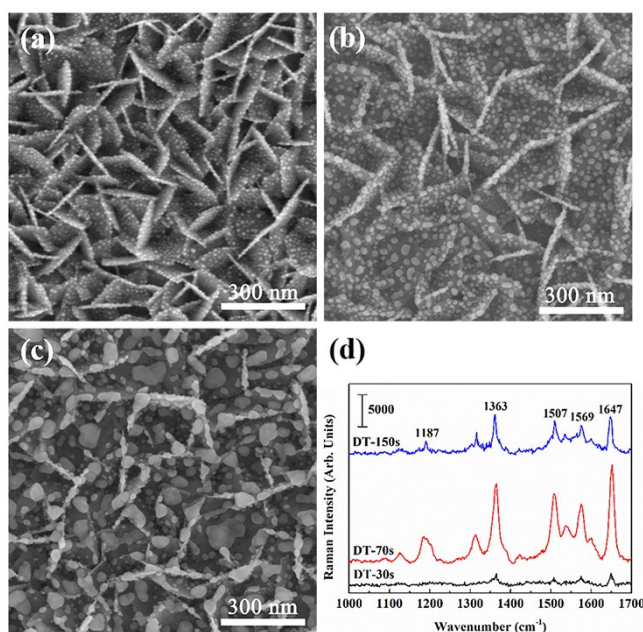

**Fig. S2** SEM images of Ag@BiOCl with different Ag depositing times: (a) 30s, (b) 70s and (c) 150s. (d) The corresponding Raman spectra of Ag@BiOCl NSs of R6G (10<sup>-7</sup> M) solution with different Ag depositing times.

### Section S3. Comparison of Raman spectra of surface modified BiOCl NSs and Si substrate

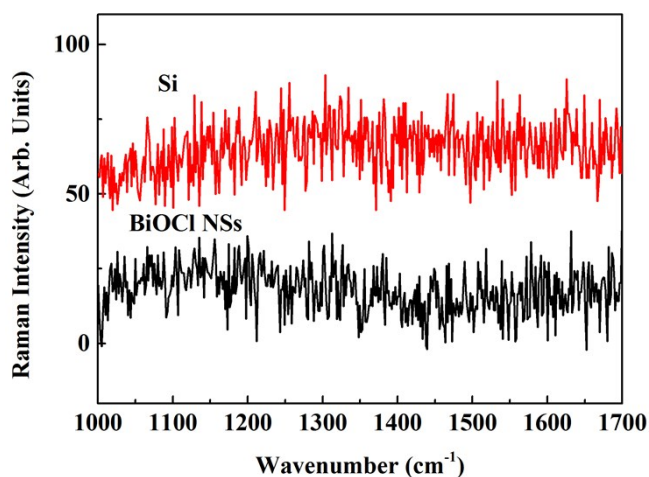

**Fig. S3** Raman spectra of BiOCl NSs substrate with surface modification and clean Si substrate.

### Section S4. Raman spectra of R6G molecules for Ag@BiOCl NSs substrate and Ag substrate

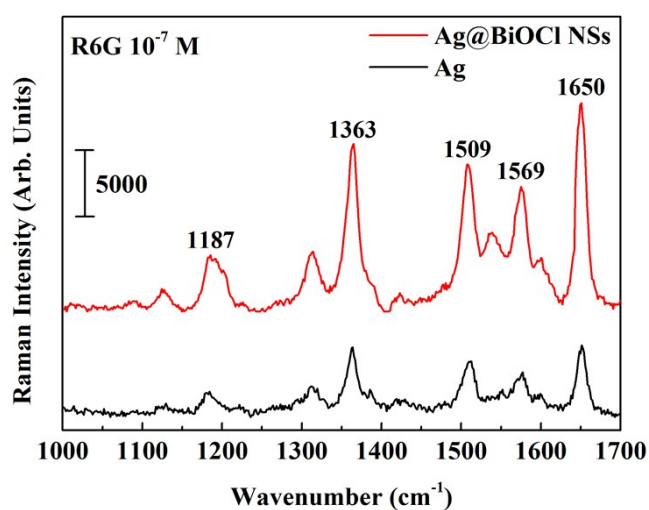

**Fig. S4** Raman spectra of R6G solution (10<sup>-7</sup> M) for Ag@BiOCl NSs and Ag nanoparticles with the same sputtering time.

## Section S5. Raman spectra of R6G molecules for Si substrate

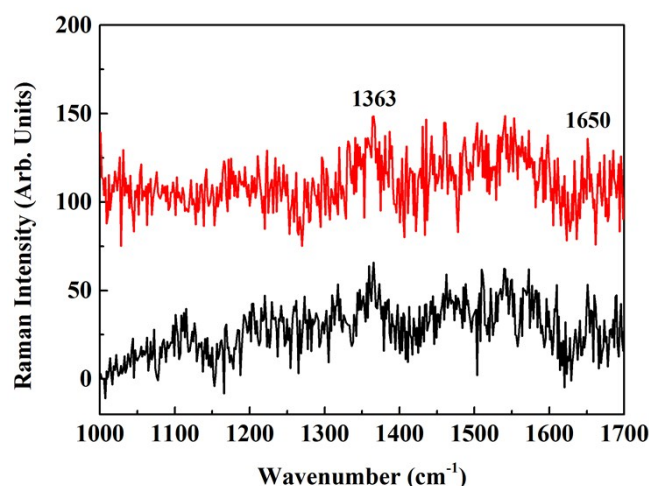

**Fig. S5** Raman spectra of R6G molecules at a concentration of  $10^{-3}$  M for Si substrate as the non-enhanced substrate. The averages value of two peak intensities are used to calculate experimental SERS EFs.

## Section S6. Calculation of experimental SERS enhancement factors

The Raman measurement experiment of the SERS substrate and that of the non-SERS substrate are performed under exactly identical experimental conditions. The power excitation laser is 514.5 nm and acquisition time is 20 s. We dropped 10.0  $\mu$ L R6G solution ( $1.0 \times 10^{-3}$  M) on non-SERS substrate for the collection of the Raman signal. The dried area was 11.28 mm<sup>2</sup> on the Si substrate.  $N_{\text{Vol}}$  of  $4.19 \times 10^{20}$  in the laser spot was estimated based on the focusing area. The same method was used to drop the concentration of  $10^{-9}$  M R6G solution on SERS substrate and got a 8.09 mm<sup>2</sup> round area.  $N_{\text{Surf}}$  of  $5.84 \times 10^{14}$  in the laser spot was estimated based on the focusing area. Raman shifts of 1363 cm<sup>-1</sup> and 1650 cm<sup>-1</sup> were chosen to calculate the  $EF_{\text{SERS}} \cdot I_{\text{SERS}}$  is 1207 at 1363 cm<sup>-1</sup> and 909.65 at 1650 cm<sup>-1</sup>, which are peak intensities from Fig. 4b.  $I_{\text{RS}}$  is 69.60 at 1363 cm<sup>-1</sup> and 57.02 at 1650 cm<sup>-1</sup>, which are average values from Fig. S5. Based on above assumptions and

calculations, we obtained the average SERS EF of Ag@BiOCl NSs chip is evaluated to be  $1.25 \times 10^7$  at  $1363 \text{ cm}^{-1}$  and  $1.15 \times 10^7$  at  $1650 \text{ cm}^{-1}$ .

#### Section S7. FDTD simulation of Ag@BiOCl NSs with different incident light polarization angles.

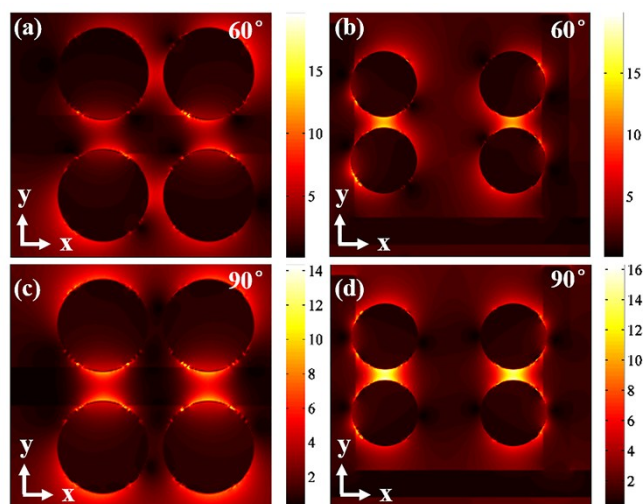

**Fig. S6** The normalized electric field intensity ( $|E|/|E_0|$ ) distribution of (a-c) between adjacent Ag particles on the single side of BiOCl NSs and of (b-d) Ag particles on adjacent BiOCl NSs with incident light polarization angles of 60 and 90 deg, respectively.

#### Section S8. Comparison between existing SERS sensors and Ag@BiOCl NSs SERS chip

Table S1. Comparison between existing SERS sensors and Ag@BiOCl NSs SERS chip

| SERS structure                                     | CA   | EFSERS            | Probe molecule | Detection limit | Reference |
|----------------------------------------------------|------|-------------------|----------------|-----------------|-----------|
| Zinc oxide nanorods array                          | 152° | —                 | 4-ATP          | 5 $\mu\text{l}$ | Ref [1]   |
| Silver capped polystyrene nanotube array           | 110° | $1.6 \times 10^6$ | 4-ABT          | ~400 ppt        | Ref [2]   |
| AgNPs on filter paper                              | 150° | —                 | melamine       | 1 ppm           | Ref [3]   |
| Cu nanoparticle-coated copper vanadate nanoribbons | —    | $1.2 \times 10^6$ | R6G            | 0.25 M          | Ref [4]   |

|                     |        |                    |     |             |           |
|---------------------|--------|--------------------|-----|-------------|-----------|
| Ag@BiOCl nanosheets | 157.4° | $1.25 \times 10^7$ | R6G | $10^{-9}$ M | This work |
|---------------------|--------|--------------------|-----|-------------|-----------|

## References

- [1] F. Xu, Y. Zhang, Y. Sun, Y. Shi, Z. Wen, Z. Li, *The Journal of Physical Chemistry C* 2011, **115**, 9977-9983.
- [2] P. Lovera, N. Creedon, H. Alatawi, M. Mitchell, M. Burke, A. J. Quinn, A. O'Riordan, *Nanotechnology* 2014, **25**, 175502-175507.
- [3] C. Zhang, T. You, N. Yang, Y. Gao, L. Jiang, P. Yin, *Food chemistry* 2019, **287**, 363-368.
- [4] H. Lin, Q. Shao, F. Hu, H. Wang, M. Shao, *Thin Solid Films* 2014, **558**, 385-390.
